# Supplementary material
Source: MDPI journal article supplement (https://www.mdpi.com/2071-1050/13/5/2746)
Supplement: s1 [file s1]

## **Supplementary Material for**

**“The Negative Impact of Uncertainty on R&D Investment:  
International Evidence”**

February 23, 2021



## Supplementary Material

|                      |      |      |      |      |      |      |      |      |
|----------------------|------|------|------|------|------|------|------|------|
| Ghana                | Low  | Low  | High | High | Low  | Low  | Low  | Low  |
| Greece               | High |
| Guatemala            | Low  | Low  | High | Low  | High | Low  | Low  | Low  |
| Honduras             | Low  | Low  | High | Low  | Low  | Low  | Low  | Low  |
| Hong Kong SAR, China | High | High | Low  | High | High | Low  | High | Low  |
| Hungary              | High |
| India                | Low  | High | Low  | High | Low  | Low  | High | Low  |
| Indonesia            | Low  | Low  | High | Low  | High | Low  | Low  | High |
| Iran, Islamic Rep.   | Low  | Low  | Low  | Low  | Low  | High | High | Low  |
| Ireland              | High | High | High | High | High | Low  | High | High |
| Israel               | High |
| Italy                | High |
| Jamaica              | Low  | Low  | High | High | High | Low  | Low  | Low  |
| Japan                | High |
| Jordan               | Low  | Low  | Low  | High | High | Low  | Low  | Low  |
| Kazakhstan           | Low  | Low  | High | Low  | Low  | High | Low  | High |
| Kenya                | Low  | High | High | Low  | High | Low  | Low  | Low  |
| Korea, Rep.          | High | Low  |
| Kuwait               | High | Low  | Low  | High | High | Low  | High | Low  |
| Kyrgyz Republic      | Low  | Low  | High | Low  | High | Low  | Low  | Low  |
| Lao PDR              | Low  |
| Latvia               | High | Low  | High | High | High | High | High | High |
| Lesotho              | Low  | Low  | High | High | Low  | Low  | Low  | Low  |
| Lithuania            | High | High | Low  | High | High | High | High | High |
| Madagascar           | Low  | Low  | High | High | Low  | Low  | Low  | Low  |
| Malaysia             | Low  | High | Low  | High | Low  | High | High | High |
| Mali                 | Low  | Low  | Low  | Low  | Low  | High | Low  | Low  |
| Mexico               | Low  | Low  | High | High | High | Low  | High | High |
| Moldova              | Low  | Low  | High | Low  | Low  | High | High | Low  |
| Mongolia             | Low  | Low  | High | High | High | High | High | Low  |
| Morocco              | Low  | High | Low  | High | Low  | Low  | Low  | Low  |
| Mozambique           | Low  | Low  | High | Low  | Low  | Low  | Low  | Low  |
| Namibia              | Low  | Low  | High | High | Low  | Low  | Low  | Low  |
| Nepal                | Low  | Low  | High | Low  | Low  | Low  | Low  | Low  |
| Netherlands          | High |
| New Zealand          | High |
| Nicaragua            | Low  | Low  | High | Low  | High | Low  | Low  | Low  |
| Nigeria              | Low  | Low  | High | Low  | Low  | Low  | Low  | Low  |
| Norway               | High |
| Pakistan             | Low  |
| Panama               | High | Low  | High | High | High | Low  | Low  | Low  |
| Paraguay             | Low  | Low  | High | Low  | High | Low  | Low  | Low  |
| Peru                 | Low  | Low  | High | High | High | Low  | Low  | High |

## Supplementary Material

|                      |      |      |      |      |      |      |      |      |
|----------------------|------|------|------|------|------|------|------|------|
| Philippines          | Low  | Low  | High | Low  | Low  | Low  | High | Low  |
| Poland               | High | High | High | High | Low  | High | High | High |
| Portugal             | High |
| Qatar                | High | Low  | Low  | High | High | Low  | High | Low  |
| Romania              | Low  | Low  | High | High | High | High | High | High |
| Russian Federation   | Low  | High | High | Low  | High | High | High | High |
| Rwanda               | Low  | High | Low  | High | Low  | Low  | Low  | Low  |
| Saudi Arabia         | High | Low  | Low  | High | High | Low  | Low  | High |
| Senegal              | Low  | Low  | High | High | Low  | High | Low  | Low  |
| Singapore            | High | High | Low  | High | High | High | High | High |
| Slovak Republic      | High |
| Slovenia             | High |
| South Africa         | Low  | High | High | High | Low  | Low  | High | High |
| Spain                | High |
| Sri Lanka            | Low  | Low  | Low  | High | Low  | Low  | Low  | Low  |
| Sudan                | Low  | Low  | High | Low  | Low  | Low  | Low  | Low  |
| Sweden               | High |
| Switzerland          | High |
| Tajikistan           | Low  |
| Tanzania             | Low  | Low  | High | Low  | Low  | Low  | Low  | Low  |
| Thailand             | Low  | Low  | High | High | Low  | Low  | High | Low  |
| Togo                 | Low  | Low  | High | Low  | Low  | High | Low  | Low  |
| Tunisia              | Low  | High | High | High | Low  | Low  | Low  | Low  |
| Turkey               | Low  | High | High | High | Low  | High | High | Low  |
| Uganda               | Low  | Low  | High | Low  | High | Low  | Low  | Low  |
| Ukraine              | Low  | High | High | Low  | Low  | High | High | Low  |
| United Arab Emirates | High | High | Low  | High | High | Low  | High | Low  |
| United Kingdom       | High |
| United States        | High |
| Uruguay              | High | Low  | High | High | High | Low  | High | Low  |
| Venezuela, RB        | Low  | Low  | High | Low  | Low  | Low  | Low  | Low  |
| Vietnam              | Low  | Low  | Low  | Low  | Low  | Low  | High | High |

Note: Some regions (e.g., the Hong Kong SAR of China) included in our analysis sample are not sovereign states. But in the paper, for convenience, we usually use the term “countries” to refer to all countries and regions.

**Table S2:** Estimated effect of uncertainty (measured by the index of stock market volatility) on R&D investment.

| <b>Independent Variable</b> | <b>Baseline Result<br/>(of Table 3)</b> | <b>Uncertainty =<br/>Index of stock<br/>market volatility</b> |
|-----------------------------|-----------------------------------------|---------------------------------------------------------------|
|                             | (i)                                     | (ii)                                                          |
| <i>Uncertainty</i>          | −0.156**<br>[0.0770]                    | −0.0977*<br>[0.0559]                                          |
| <i>ln(Population)</i>       | 1.000**<br>[0.4487]                     | 1.516***<br>[0.5360]                                          |
| <i>ln(GDPPerCapita)</i>     | 1.160***<br>[0.2052]                    | 1.039***<br>[0.3024]                                          |
| <i>GDPGrowthRate</i>        | −0.00299<br>[0.0044]                    | 0.00168<br>[0.0033]                                           |
| <i>UnemploymentRate</i>     | 0.0127<br>[0.0080]                      | 0.0113*<br>[0.0067]                                           |
| <i>FinancialDevelopment</i> | 0.209<br>[0.3661]                       | 0.375<br>[0.4006]                                             |
| <i>FinancialOpenness</i>    | 0.0327<br>[0.1337]                      | −0.0717<br>[0.1201]                                           |
| <i>TradeOpenness</i>        | 0.00227*<br>[0.0012]                    | 0.00219*<br>[0.0011]                                          |
| <i>HumanCapital</i>         | 0.513*<br>[0.2893]                      | 0.485<br>[0.2955]                                             |
| <i>GovernmentSize</i>       | 0.0249*<br>[0.0141]                     | 0.0162<br>[0.0181]                                            |
| <i>ControlofCorruption</i>  | 0.258*<br>[0.1458]                      | 0.222*<br>[0.1299]                                            |
| <i>RuleofLaw</i>            | −0.161<br>[0.1590]                      | −0.294*<br>[0.1747]                                           |
| Country-fixed effect        | Yes                                     | Yes                                                           |
| Time-fixed effect           | Yes                                     | Yes                                                           |
| Observations                | 1497                                    | 1101                                                          |
| Countries                   | 109                                     | 73                                                            |
| R <sup>2</sup>              | 0.555                                   | 0.672                                                         |

Note: \*\*\*, \*\*, and \* represent the significance levels of 1%, 5%, and 10%, respectively. Robust standard errors are reported in parentheses.

**Table S3:** Estimated effect of uncertainty on R&D investment after mitigating the endogeneity issue.

| Independent Variable        | Baseline Result<br>(of Table 3) | Use Alternative Methods to Mitigate Endogeneity Issue           |                                                                  |                               |                           |
|-----------------------------|---------------------------------|-----------------------------------------------------------------|------------------------------------------------------------------|-------------------------------|---------------------------|
|                             |                                 | Use 1-year-lagged<br><i>Uncertainty as explanatory variable</i> | Use 1-year-lagged<br><i>Uncertainty as instrumental variable</i> | Use Difference GMM estimation | Use System GMM estimation |
|                             | (i)                             | (ii)                                                            | (iii)                                                            | (iv)                          | (v)                       |
| <i>Uncertainty</i>          | −0.156**<br>[0.0770]            | −0.188**<br>[0.0843]                                            | −0.616**<br>[0.2524]                                             | −0.112**<br>[0.0445]          | −0.153***<br>[0.0409]     |
| <i>ln(Population)</i>       | 1.000**<br>[0.4487]             | 0.893*<br>[0.4541]                                              | 0.827***<br>[0.2375]                                             | 0.257<br>[0.3056]             | 1.037***<br>[0.2323]      |
| <i>ln(GDPPerCapita)</i>     | 1.160***<br>[0.2052]            | 1.141***<br>[0.2038]                                            | 1.121***<br>[0.0843]                                             | 1.002***<br>[0.2412]          | 1.182***<br>[0.1642]      |
| <i>GDPGrowthRate</i>        | −0.00299<br>[0.0044]            | −0.00104<br>[0.0044]                                            | −0.00240<br>[0.0039]                                             | 0.000909<br>[0.0040]          | 0.00522<br>[0.0037]       |
| <i>UnemploymentRate</i>     | 0.0127<br>[0.0080]              | 0.0128<br>[0.0080]                                              | 0.0130***<br>[0.0040]                                            | 0.0238***<br>[0.0081]         | 0.0236***<br>[0.0064]     |
| <i>FinancialDevelopment</i> | 0.209<br>[0.3661]               | 0.0598<br>[0.3895]                                              | 0.0000885<br>[0.2164]                                            | −0.0235<br>[0.3843]           | −0.437<br>[0.3141]        |
| <i>FinancialOpenness</i>    | 0.0327<br>[0.1337]              | 0.0671<br>[0.1342]                                              | 0.0639<br>[0.0697]                                               | −0.288***<br>[0.1051]         | −0.176**<br>[0.0882]      |
| <i>TradeOpenness</i>        | 0.00227*<br>[0.0012]            | 0.00187*<br>[0.0011]                                            | 0.00193***<br>[0.0006]                                           | −0.000255<br>[0.0013]         | 0.00363***<br>[0.0010]    |
| <i>HumanCapital</i>         | 0.513*<br>[0.2893]              | 0.505*<br>[0.2919]                                              | 0.572***<br>[0.1322]                                             | 0.971***<br>[0.2210]          | 0.962***<br>[0.1741]      |
| <i>GovernmentSize</i>       | 0.0249*<br>[0.0141]             | 0.0228<br>[0.0140]                                              | 0.0226***<br>[0.0076]                                            | 0.00268<br>[0.0107]           | 0.0572***<br>[0.0093]     |
| <i>ControlofCorruption</i>  | 0.258*<br>[0.1458]              | 0.276*<br>[0.1452]                                              | 0.261***<br>[0.0798]                                             | −0.129<br>[0.0992]            | −0.100<br>[0.0944]        |
| <i>RuleofLaw</i>            | −0.161<br>[0.1590]              | −0.176<br>[0.1599]                                              | −0.201**<br>[0.0785]                                             | −0.176*<br>[0.1043]           | −0.0250<br>[0.0913]       |
| Country-fixed effect        | Yes                             | Yes                                                             | Yes                                                              | Yes                           | Yes                       |
| Time-fixed effect           | Yes                             | Yes                                                             | Yes                                                              | Yes                           | Yes                       |
| Observations                | 1497                            | 1450                                                            | 1444                                                             | 1256                          | 1256                      |
| Countries                   | 109                             | 109                                                             | 103                                                              | 88                            | 88                        |
| R <sup>2</sup>              | 0.555                           | 0.536                                                           | 0.520                                                            | −                             | −                         |

Note: \*\*\*, \*\*, and \* represent the significance levels of 1%, 5%, and 10%, respectively. Robust standard errors are reported in parentheses.

**Table S4:** Estimated effect of uncertainty on R&D investment based on the multi-year-average data.

| Independent Variable        | Baseline Result<br>(of Table 3) | Use Multi-Year-Average Variables |                              |                              |                              |
|-----------------------------|---------------------------------|----------------------------------|------------------------------|------------------------------|------------------------------|
|                             |                                 | Use 2-year-average variables     | Use 3-year-average variables | Use 4-year-average variables | Use 5-year-average variables |
|                             | (i)                             | (ii)                             | (iii)                        | (iv)                         | (v)                          |
| <i>Uncertainty</i>          | −0.156**<br>[0.0770]            | −0.200*<br>[0.1172]              | −0.258*<br>[0.1502]          | −0.128<br>[0.2416]           | −0.255<br>[0.2530]           |
| <i>ln(Population)</i>       | 1.000**<br>[0.4487]             | 0.823*<br>[0.4791]               | 1.018**<br>[0.4286]          | 0.867*<br>[0.4652]           | 0.760<br>[0.4625]            |
| <i>ln(GDPPerCapita)</i>     | 1.160***<br>[0.2052]            | 1.171***<br>[0.2358]             | 1.104***<br>[0.2641]         | 1.038***<br>[0.3013]         | 1.168***<br>[0.2888]         |
| <i>GDPGrowthRate</i>        | −0.00299<br>[0.0044]            | 0.00308<br>[0.0072]              | 0.00207<br>[0.0085]          | 0.00401<br>[0.0097]          | −0.00582<br>[0.0146]         |
| <i>UnemploymentRate</i>     | 0.0127<br>[0.0080]              | 0.0143*<br>[0.0082]              | 0.00913<br>[0.0071]          | 0.0115<br>[0.0080]           | 0.0130<br>[0.0090]           |
| <i>FinancialDevelopment</i> | 0.209<br>[0.3661]               | 0.339<br>[0.4459]                | 0.300<br>[0.4502]            | 0.444<br>[0.3878]            | 0.419<br>[0.5258]            |
| <i>FinancialOpenness</i>    | 0.0327<br>[0.1337]              | 0.0248<br>[0.1480]               | 0.000964<br>[0.1360]         | −0.0616<br>[0.1406]          | −0.0655<br>[0.1421]          |
| <i>TradeOpenness</i>        | 0.00227*<br>[0.0012]            | 0.00249**<br>[0.0012]            | 0.00248**<br>[0.0010]        | 0.00275**<br>[0.0012]        | 0.00279*<br>[0.0015]         |
| <i>HumanCapital</i>         | 0.513*<br>[0.2893]              | 0.466<br>[0.3140]                | 0.346<br>[0.2569]            | 0.277<br>[0.3098]            | 0.249<br>[0.3563]            |
| <i>GovernmentSize</i>       | 0.0249*<br>[0.0141]             | 0.0286*<br>[0.0169]              | 0.0207<br>[0.0157]           | 0.0122<br>[0.0246]           | 0.0211<br>[0.0235]           |
| <i>ControlofCorruption</i>  | 0.258*<br>[0.1458]              | 0.266<br>[0.1713]                | 0.175<br>[0.1441]            | 0.0224<br>[0.1902]           | −0.0196<br>[0.1794]          |
| <i>RuleofLaw</i>            | −0.161<br>[0.1590]              | −0.233<br>[0.1591]               | −0.296*<br>[0.1751]          | −0.132<br>[0.1741]           | −0.196<br>[0.1877]           |
| Country-fixed effect        | Yes                             | Yes                              | Yes                          | Yes                          | Yes                          |
| Time-fixed effect           | Yes                             | Yes                              | Yes                          | Yes                          | Yes                          |
| Observations                | 1497                            | 643                              | 390                          | 264                          | 208                          |
| Countries                   | 109                             | 86                               | 78                           | 71                           | 71                           |
| R <sup>2</sup>              | 0.555                           | 0.606                            | 0.692                        | 0.740                        | 0.779                        |

Note: \*\*\*, \*\*, and \* represent the significance levels of 1%, 5%, and 10%, respectively. Robust standard errors are reported in parentheses.

**Table S5:** Estimated effect of uncertainty on R&D investment based on a model investigating the possible structural change around 2008.

| Independent Variable                               | Baseline Model        | Robustness Check                   |                                                                |                                                              |                                                       |                                                       |
|----------------------------------------------------|-----------------------|------------------------------------|----------------------------------------------------------------|--------------------------------------------------------------|-------------------------------------------------------|-------------------------------------------------------|
|                                                    |                       | Winsorize top and bottom 1% sample | y = Logarithmic value of R&D investment per million population | y = Logarithmic value of R&D investment per million US\$ GDP | Uncertainty = Dummy variable for legislative election | Uncertainty = Economic policy uncertainty (EPU) index |
|                                                    | (i)                   | (ii)                               | (iii)                                                          | (iv)                                                         | (v)                                                   | (vi)                                                  |
| <i>Uncertainty</i>                                 | −0.265*<br>[0.1479]   | −0.261*<br>[0.1515]                | −0.266*<br>[0.1484]                                            | −0.250*<br>[0.1451]                                          | −0.0344**<br>[0.0137]                                 | −0.0976*<br>[0.0505]                                  |
| <i>Uncertainty</i> × <i>D</i> <sup>after2008</sup> | 0.173<br>[0.1968]     | 0.171<br>[0.2043]                  | 0.174<br>[0.2063]                                              | 0.144<br>[0.2005]                                            | 0.0380<br>[0.0238]                                    | −0.00410<br>[0.0667]                                  |
| <i>ln(Population)</i>                              | 1.014**<br>[0.4442]   | 1.000**<br>[0.4414]                | -<br>-                                                         | -<br>-                                                       | 0.595<br>[0.6545]                                     | 0.696<br>[0.5664]                                     |
| <i>ln(GDPPerCapita)</i>                            | 1.172***<br>[0.2076]  | 1.188***<br>[0.2061]               | 1.169***<br>[0.2034]                                           | -<br>-                                                       | 0.939***<br>[0.1757]                                  | 1.477***<br>[0.2218]                                  |
| <i>GDPGrowthRate</i>                               | −0.00338<br>[0.0045]  | −0.00114<br>[0.0038]               | −0.00341<br>[0.0048]                                           | −0.00278<br>[0.0047]                                         | −0.00174<br>[0.0036]                                  | −0.00437<br>[0.0026]                                  |
| <i>UnemploymentRate</i>                            | 0.0130<br>[0.0079]    | 0.0135*<br>[0.0079]                | 0.0130<br>[0.0081]                                             | 0.0116<br>[0.0074]                                           | 0.00565<br>[0.0070]                                   | 0.0126<br>[0.0077]                                    |
| <i>FinancialDevelopment</i>                        | 0.209<br>[0.3634]     | 0.234<br>[0.3629]                  | 0.209<br>[0.3671]                                              | 0.277<br>[0.3760]                                            | 0.220<br>[0.3599]                                     | 0.358<br>[0.3178]                                     |
| <i>FinancialOpenness</i>                           | 0.0317<br>[0.1331]    | 0.0294<br>[0.1334]                 | 0.0293<br>[0.1339]                                             | 0.0413<br>[0.1319]                                           | 0.219<br>[0.1316]                                     | −0.0181<br>[0.1794]                                   |
| <i>TradeOpenness</i>                               | 0.00229**<br>[0.0012] | 0.00232**<br>[0.0012]              | 0.00228**<br>[0.0011]                                          | 0.00213*<br>[0.0011]                                         | 0.00364***<br>[0.0013]                                | 0.00185**<br>[0.0008]                                 |
| <i>HumanCapital</i>                                | 0.502*<br>[0.2908]    | 0.552*<br>[0.2912]                 | 0.501*<br>[0.2849]                                             | 0.512*<br>[0.2851]                                           | 0.487<br>[0.3944]                                     | 0.175<br>[0.1592]                                     |
| <i>GovernmentSize</i>                              | 0.0246*<br>[0.0140]   | 0.0259*<br>[0.0140]                | 0.0246*<br>[0.0143]                                            | 0.0221<br>[0.0148]                                           | 0.0333**<br>[0.0160]                                  | 0.0143<br>[0.0128]                                    |
| <i>ControlofCorruption</i>                         | 0.254*<br>[0.1447]    | 0.257*<br>[0.1443]                 | 0.254*<br>[0.1462]                                             | 0.274*<br>[0.1476]                                           | 0.202<br>[0.1666]                                     | −0.0735<br>[0.1047]                                   |
| <i>RuleofLaw</i>                                   | −0.156<br>[0.1567]    | −0.161<br>[0.1561]                 | −0.157<br>[0.1599]                                             | −0.138<br>[0.1586]                                           | −0.0933<br>[0.1813]                                   | −0.021<br>[0.1629]                                    |
| Country-fixed effect                               | Yes                   | Yes                                | Yes                                                            | Yes                                                          | Yes                                                   | Yes                                                   |
| Time-fixed effect                                  | Yes                   | Yes                                | Yes                                                            | Yes                                                          | Yes                                                   | Yes                                                   |
| Observations                                       | 1497                  | 1497                               | 1497                                                           | 1497                                                         | 1179                                                  | 496                                                   |
| Countries                                          | 109                   | 109                                | 109                                                            | 109                                                          | 76                                                    | 26                                                    |
| R <sup>2</sup>                                     | 0.555                 | 0.559                              | 0.490                                                          | 0.155                                                        | 0.593                                                 | 0.892                                                 |

Note: \*\*\*, \*\*, and \* represent the significance levels of 1%, 5%, and 10%, respectively. Robust standard errors are reported in parentheses.



**Table S6:** Estimated effect of uncertainty in different country groups with different innovative abilities.

| Classification Criterion                     | Dependent Variable:<br><i>ln(R&amp;DInvestment)</i> |                     | Dependent Variable:<br><i>ln(Patent)</i> |                      |
|----------------------------------------------|-----------------------------------------------------|---------------------|------------------------------------------|----------------------|
|                                              | High-Group                                          | Low-Group           | High-Group                               | Low-Group            |
|                                              | (i)                                                 | (ii)                | (iii)                                    | (iv)                 |
| (#a) Number of patent per capita             | −0.0312<br>[0.0855]                                 | −0.258*<br>[0.1426] | −0.215*<br>[0.1150]                      | −0.275**<br>[0.1171] |
| (#b) Global innovation index 2019            | −0.193**<br>[0.0759]                                | −0.228<br>[0.1584]  | −0.152<br>[0.0928]                       | −0.462*<br>[0.2277]  |
| (#c) International innovation scorecard 2019 | −0.213**<br>[0.0917]                                | −0.173<br>[0.1606]  | −0.193**<br>[0.0759]                     | −0.228<br>[0.1584]   |

Note: (1) \*\*\*, \*\*, and \* represent the significance levels of 1%, 5%, and 10%, respectively. Robust standard errors are reported in parentheses. In order to save space, only the coefficient of *Uncertainty* is reported in the table. The estimated coefficients of control variables are available from the authors upon request. (2) In row (#a), the countries were classified according to the number of annual new patent per capita. If the average value over the sample period of a country was above the sample median, the country was put into the “High-Group”. Otherwise, the country was included in the “Low-Group”. (3) In row (#b), the countries were grouped according to the ranking of “Global Innovation Index 2019” provided by the World Intellectual Property Organization (WIPO). The data were extracted from the published report “The Global Innovation Index 2019: Creating Healthy Lives—The Future of Medical Innovation” ([https://www.wipo.int/global\\_innovation\\_index/en/2019/](https://www.wipo.int/global_innovation_index/en/2019/)). The countries with rankings above the sample median were grouped into the “High-Group”, and into the “Low-Group” otherwise. (3) In row (#c), the countries were classified based on the ranking of “International Innovation Scorecard 2019” constructed by the Consumer Technology Association (CTA) of the US. The data were available from its website (<https://cta.tech/Advocacy/Innovation-Scorecard/International-Scorecard/Data>). In the scorecard, different countries were labelled as “Innovation Champion”, “Innovation Leader”, “Innovation Adopter” or “Modest Innovator”. In our classification, the countries of “Innovation Champion”, “Innovation Leader” and “Innovation Adopter” were grouped into the “High-Group”, and other countries were grouped into the “Low-Group”. (4) The list of countries in different groups was recorded in columns (vi)—(viii) of Table S1.
